# 1 Cooperative nucleotide binding in Hsp90 and the underlying mechanisms

2 Philipp Wortmann<sup>1#</sup>, Markus Götz<sup>1#</sup>, Thorsten Hugel<sup>1\*</sup>

3 <sup>1</sup>*Institute of Physical Chemistry, University of Freiburg, Freiburg, Germany*

4 <sup>#</sup>*These authors contributed equally to this work*

5 <sup>\*</sup>*Corresponding author: [th@pc.uni-freiburg.de](mailto:th@pc.uni-freiburg.de)*

6

## 7 Abstract

8 The function of the molecular chaperone Hsp90 depends on large conformational changes,  
9 rearrangement of local motifs, as well as the binding and hydrolysis of ATP. The complexity of  
10 the Hsp90 system impedes the detailed investigation of their interplay using standard methods.  
11 By the application of three-color single molecule FRET to Hsp90 and a reporter nucleotide, we  
12 directly observe cooperativity between the two nucleotide binding pockets in the protein dimer.  
13 Through allocating the microscopic states and extracting their kinetics, we identify the  
14 mechanisms underlying the cooperativity. Surprisingly, nucleotide binding affects several state  
15 transitions, which demonstrates the complexity of cooperativity in protein systems. The co-  
16 chaperone Aha1, known to accelerate Hsp90's ATPase activity, adds another layer of  
17 complexity by affecting transitions in a nucleotide-dependent and -independent manner.

18

## 19 Introduction

20 The molecular chaperone heat shock protein 90 (Hsp90) is the most abundant protein found in  
21 cells, accounting for up to 1-2 % of all cytosolic protein under physiological conditions<sup>1</sup>. It is  
22 highly conserved and essential in all eukaryotes<sup>2</sup>. A set of more than 20 co-chaperones is  
23 known to regulate the protein's function, building a complex network of transient interactions<sup>1</sup>.  
24 This Hsp90 machinery is essential for the correct folding of many cellular proteins as well as the  
25 maturation of kinases and steroid hormone receptors. It has thus become a popular drug target  
26 with several inhibitors developed and put into clinical trial for cancer therapy<sup>3</sup>. However, the way  
27 Hsp90 fulfills this job remains enigmatic.

28 Hsp90 is a homodimer consisting of three domains, the N-, the middle- and the C-terminal  
29 domain (NTD, MD, CTD). The NTD can bind and hydrolyze ATP. Hydrolysis in Hsp90s is very  
30 slow, e.g. about 1 ATP/min for the yeast homologue<sup>4</sup>. While stably dimerized at the CTD<sup>5</sup>, the  
31 relative orientation of the domains is dynamic and the dimer exhibits transitions between  
32 globally closed and largely open conformations<sup>6-8</sup>.

33 Yet, the interplay between nucleotide binding, hydrolysis and conformational changes of Hsp90  
34 is poorly understood so far. ATP binding and hydrolysis weakly affect the conformational  
35 equilibrium between the globally open and closed conformations of Hsp90<sup>9,10</sup>. Only incubation  
36 with the non-hydrolysable ATP transition state analogue AMP-PNP leads to a stable closed  
37 structure of the otherwise predominately open Hsp90 dimer<sup>7</sup>.

38 Several bulk experiments and mutational studies have provided controversial results on the  
39 relationship between nucleotide binding, structural rearrangements and ATP hydrolysis<sup>5,11-13</sup>.

40 The standard procedure to access the interplay between two binding sites for a ligand (i.e.  
41 cooperativity) in a protein system is usually the evaluation of Hill-plots from bulk experiments,  
42 where the binding site occupation is measured as a function of ligand concentration.  
43 Cooperativity leads to a deviation from a slope of one in a log-log plot. However, this evaluation  
44 is limited by the simplifications of the underlying models<sup>14</sup> and weak cooperativity is hardly  
45 detectable (Supplementary Results, Supplementary Fig. 1). But in the case of Hsp90, most  
46 interactions with clients, co-chaperones and nucleotides do not exhibit strong effects on its  
47 dynamics. Therefore, this procedure is not suitable for the characterization of any possible  
48 cooperative effects in Hsp90.

49 By applying three-color single molecule Förster Resonance Energy Transfer (smFRET)<sup>15-17</sup> we  
50 are now able to resolve the microscopic states of the interaction between Hsp90 and  
51 nucleotides. Together with the kinetic description this enables us to detect effects that were  
52 previously hidden in the averaged ensemble data.

53 Our data reveals the first direct evidence of cooperativity between the two nucleotide binding  
54 pockets in the Hsp90 dimer. We can quantify the diverse effects on the microscopic state  
55 transitions of Hsp90 caused by bound nucleotide. This allows us to trace the mechanisms  
56 underlying the cooperativity. Moreover, we find that the co-chaperone Aha1 modulates the two  
57 nucleotide binding pockets and their interplay by an additional mechanism.

58

## 59 **Results**

### 60 The nucleotide binding pockets of Hsp90 act cooperatively

61 We study the effect of a native nucleotide on the *trans* nucleotide binding pocket with  
62 fluorescently labeled AMP-PNP as reporter nucleotide (subsequently denoted as AMP-PNP\*  
63 In order to follow the nucleotide binding state of Hsp90 while tracking the conformation of Hsp90  
64 at the same time, we perform three-color smFRET measurements on labeled Hsp90 (Fig. 1a).  
65 The Hsp90 dimers are attached to the surface of a flow chamber and studied in the presence of  
66 25 nM AMP-PNP\* as detailed in<sup>17</sup>. This approach ensures that only one AMP-PNP\* is bound at  
67 a time and that the second nucleotide binding site is accessible to the unlabeled nucleotide. The  
68 partial fluorescence (PF, the extension of the FRET efficiency for multi-color experiments)  
69 calculated from the fluorescence intensities is directly related to the spatial inter-dye distance by  
70 the Förster radius  $R_0$ . To get the full information on all three distances between the three dyes,  
71 alternating laser excitation is used.

72 We are able to distinguish and allocate five different states to this system, as depicted in  
73 Figure 1b, of which four are functionally different. Namely, open nucleotide-free (O), open AMP-  
74 PNP\* bound (O\*), closed nucleotide-free (C) and closed AMP-PNP\* bound (C\*). The data (i.e.  
75 the fluorescence intensity traces; Fig. 1c) spans a three-dimensional space of the different PFs,  
76 which we subsequently use for state separation (Fig. 1d).

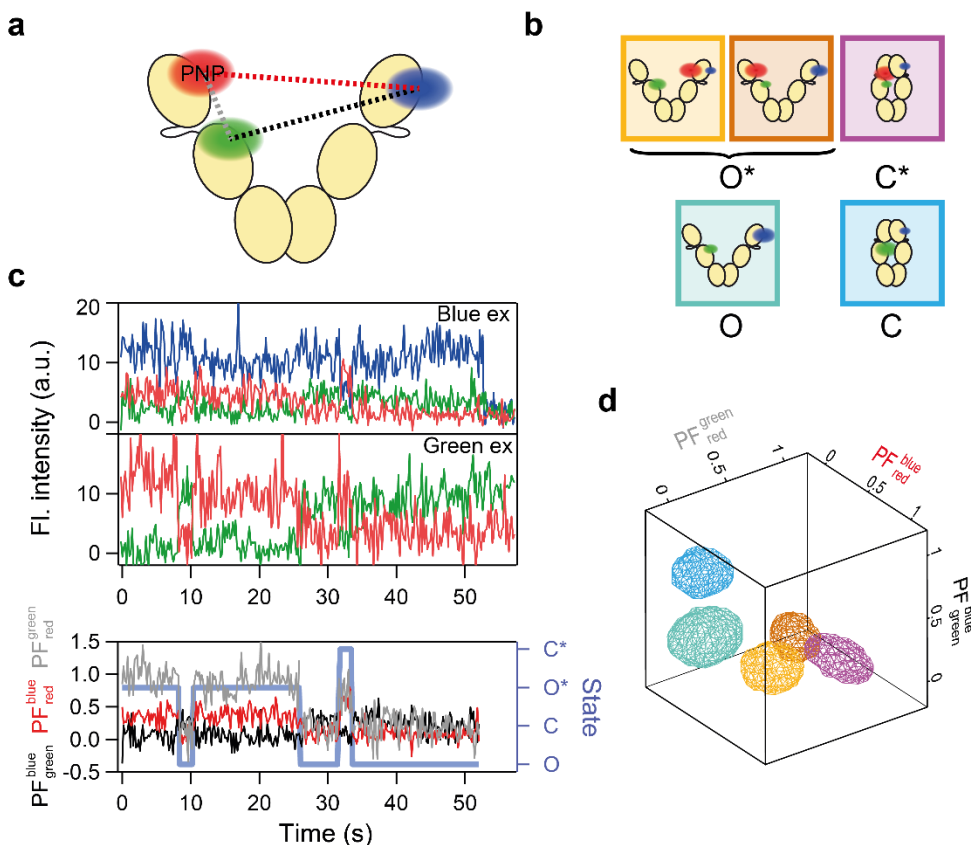

77

78 Figure 1: Data analysis and state allocation. (a) Pictogram of the studied system consisting of  
 79 Hsp90 and the reporter nucleotide AMP-PNP\* (PNP). (b) Pictograms of the distinguishable  
 80 states and their identifier used in this work. The first two populations represent the same  
 81 functional state O\*. (c) Example fluorescence traces after the excitation of the blue (top) and the  
 82 green (center) dye. The partial fluorescences ( $PF_{em}^{ex}$ , with excitation of the *ex* dye and emission  
 83 of the *em* dye) calculated from the intensity traces are shown at the bottom. The state allocation  
 84 is shown in light blue. (d) 3D representation of the Gaussians (isosurface at FWHM) fitted to the  
 85 partial fluorescence data, which represent the five different populations. The color code is the  
 86 same as in (b).

87

88 We collect traces from more than 400 single molecules that exhibited single AMP-PNP\* binding  
 89 under each experimental condition. A three-dimensional Hidden Markov Model (HMM) is used  
 90 to allocate states in the individual smFRET time traces and extract a kinetic model from the  
 91 data<sup>17</sup>.

92 With our single molecule approach we are able to measure the time for a single AMP-PNP\* to  
 93 stay bound to Hsp90 (Fig. 2a). Analyzing more than 800 dissociation events, we find that the  
 94 average dwell time of AMP-PNP\* on Hsp90 is  $5.9 \pm 0.3$  s (Fig. 2b). If no cooperativity between  
 95 the two binding pockets of Hsp90 existed, the addition of unlabeled nucleotide would not affect  
 96 the average dwell time of the reporter already bound to Hsp90. Surprisingly, under conditions  
 97 with additional, native ATP or AMP-PNP, the average dwell time is increased significantly by  
 98 almost 50 % to  $8.8 \pm 0.3$  s. Thus, the binding of a second nucleotide to the Hsp90 dimer

99 decreases the apparent overall dissociation probability of the reporter nucleotide AMP-PNP\*  
100 (averaged over all conformations of Hsp90), i.e. the two nucleotide binding pockets are not  
101 independent of each other. In other words, there exists cooperativity between the two binding  
102 pockets of Hsp90.

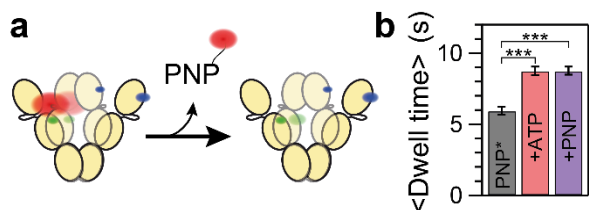

103  
104 Figure 2: The average dwell time of the reporter nucleotide AMP-PNP\* bound to Hsp90 is  
105 prolonged by additional nucleotide. (a) Pictogram of the observed dissociation of labeled AMP-  
106 PNP\* (PNP) from the Hsp90 dimer. (b) Average dwell time of AMP-PNP\* bound to Hsp90  
107 without additional nucleotide (black) and with ATP (red) or AMP-PNP (purple) present. Error  
108 bars represent the standard deviations estimated from jackknife resampling. Differences  
109 between the dwell time distributions are significant with a p-value <math>< 0.001</math> (\*\*\*)).

110  
111 As Hsp90 is a complex system with at least two distinct global conformations and several local  
112 motifs that could mediate this effect, a more detailed analysis is necessary in order to be able to  
113 identify its cause.

#### 114 Nucleotides have multiple effects on Hsp90

115 Figure 3a shows, that the ratio of Hsp90 with AMP-PNP\* bound in the open and the closed state  
116 ( $O^*/C^*$ ) is shifted towards the closed state in the presence of additional nucleotide. Hence, ATP  
117 and AMP-PNP have a similar effect on both the mean dwell time of AMP-PNP\* and the  
118 population shift between  $O^*$  and  $C^*$ . However, the underlying mechanism of this effect remains  
119 unclear at this stage. The increase in the population of  $C^*$  could be due to an increase in the  
120 rates leading to this state or due to a decrease in the rates depopulating this state. Accordingly,  
121 the increase in the average dwell time of bound AMP-PNP\* may be caused by the shift from  $O^*$   
122 to  $C^*$  (which has a slower dissociation rate of PNP\*) or by a decrease in the dissociation rate  
123 from  $O^*$  - or by a combination of both. Only a complete kinetic description can provide  
124 information about the actual mechanism mediating cooperativity in Hsp90. For such a multi-  
125 state system, this is currently only possible by a single molecule approach.

126 Our three-color smFRET data enables us to simultaneously resolve the microscopic rates for  
127 conformational changes and AMP-PNP\* unbinding for Hsp90. As shown in Figure 3b, additional  
128 nucleotide affects the nucleotide dissociation and the conformational transitions differently. On  
129 the one hand, additional nucleotide decreases the rates for AMP-PNP\* dissociation from both  
130 conformational states of Hsp90 ( $O^* \rightarrow O$  and to a lesser extent  $C^* \rightarrow C$ ). On the other hand, the  
131 equilibrium between  $O^*$  and  $C^*$  is shifted by both, increasing the rate for closing ( $O^* \rightarrow C^*$ ) and  
132 decreasing the rate for opening ( $C^* \rightarrow O^*$ ). Since the bleach rates in all data sets are similar, this  
133 effect is not introduced into our data by different bleaching times (Supplementary Fig. 2).

134 Thus, cooperativity is not caused by the nucleotide affecting one single rate, but by the  
 135 combined effects of the nucleotide on four rates (indicated by \*\* in Fig. 3b) in the studied  
 136 system.

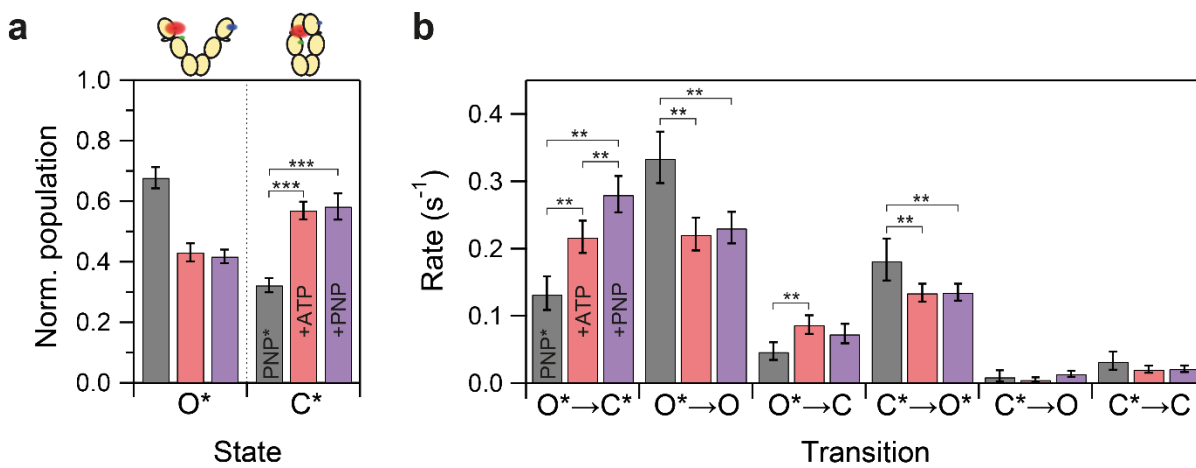

137  
 138 Figure 3: The effects of nucleotide on Hsp90's conformation and its state transitions. (a)  
 139 Populations of open and closed conformation for Hsp90 bound to AMP-PNP\* (normalized to  
 140 unity) without additional nucleotide (black) and in presence ATP (red) or AMP-PNP (purple).  
 141 Error bars represent the standard deviation within ten subsets, each comprising 75 % of the full  
 142 dataset. The addition of nucleotide results in a significant population shift with a p-value<0.001  
 143 (\*\*\*). (b) Transition rates for Hsp90 bound to labeled AMP-PNP\* in dependence of additional  
 144 nucleotide. Error bars represent the 99 % confidence interval (CI), differences with p<0.01 (CIs  
 145 do not overlap) are highlighted (\*\*).

146  
 147 Aha1 and nucleotide binding affect Hsp90 by independent and interfering mechanisms

148 The ATPase activity of Hsp90 is known to be affected by regulatory co-chaperones. The  
 149 strongest stimulating effect has been found for Aha1 so far, with a more than tenfold  
 150 acceleration of the ATPase activity<sup>18</sup>. Since nucleotide binding is a prerequisite for hydrolysis,  
 151 the question arises whether Aha1 affects the cooperativity of this process.

152 Therefore, we test the effect of Aha1 on the cooperativity in nucleotide binding by the addition of  
 153 10 μM of wild-type Aha1 to our assay. In absence of additional ATP, Aha1 alone already  
 154 increases the mean dwell time of the reporter nucleotide bound to Hsp90 from  $5.9 \pm 0.3$  s to  
 155  $7.7 \pm 0.3$  s (Fig. 4a). Surprisingly, the combination of Aha1 and ATP increases the dwell time of  
 156 AMP-PNP\* ( $7.0 \pm 0.3$  s) to a lesser degree than either Aha1 or ATP do. Thus, the effects of ATP  
 157 and Aha1 are not additive.

158 Figure 4b shows, how the O\*/C\* ratio of nucleotide bound Hsp90 is shifted towards the C\* state  
 159 by the addition of Aha1. In contrast to our findings for the dwell times, the combination of ATP  
 160 and Aha1 leads to a more pronounced effect on the O\*/C\* ratio than each of them separately.  
 161 Hence, Aha1 and ATP affect independent processes of Hsp90 and these processes interfere  
 162 with each other.

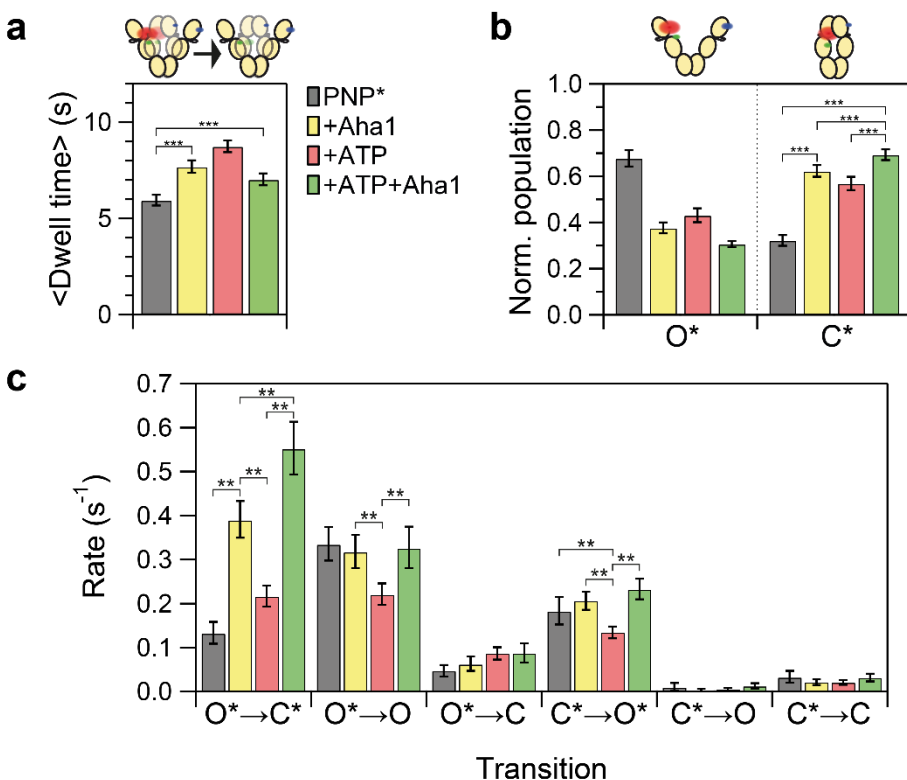

163

164 Figure 4: The effects of Aha1 (yellow), ATP (red) and Aha1 combined with ATP (green) on  
 165 Hsp90 and AMP-PNP\*. (a) The mean dwell time of AMP-PNP\* on Hsp90 is significantly ( $p <$   
 166  $0.001$ , \*\*\*) increased by Aha1. The effect observed for Aha1+ATP is smaller than for Aha1 or  
 167 ATP alone. Error bars are calculated as in Fig. 2. (b) The effects on the normalized population  
 168 of open and closed conformation for Hsp90 bound to AMP-PNP\*. Error bars are calculated as in  
 169 Fig. 3a. (c) The transition rates and the effects of nucleotide, co-chaperone and their  
 170 combination. Errors bars represent the 99 % CI, differences with  $p < 0.01$  are highlighted (\*\*).

171

172 The HMM analysis of the three-color smFRET data (Fig. 4c) provides a more detailed  
 173 understanding of the microscopic mechanisms causing our observations. Aha1 alone  
 174 accelerates the transition from open, AMP-PNP\* bound Hsp90 (O\*) to the closed state (C\*),  
 175 even stronger than ATP. In combination of Aha1 with ATP, this effect from both actually adds  
 176 up. In contrast, the transitions from closed Hsp90 with AMP-PNP\* bound to the open state as  
 177 well as the dissociation of labeled nucleotide from open Hsp90 are increased to values similar to  
 178 the ones observed without ATP and Aha1. Therefore, here Aha1 attenuates the additional  
 179 effects of ATP.

180

## 181 Discussion

182 The presented assay, based on the binding of the reporter nucleotide AMP-PNP\* to one  
 183 protomer of Hsp90, provides for the first time a detailed insight into the cooperation of the two  
 184 nucleotide binding sites in the Hsp90 dimer. AMP-PNP\* is not hydrolyzable and binds to the



185 nucleotide binding pocket of Hsp90 with higher affinity than the unlabeled nucleotide  
186 (Supplementary Fig. 5 and 6). This makes it a highly useful reporter for an otherwise hardly  
187 accessible state of Hsp90, namely the state in which exactly one NTD adopts a conformation  
188 that presumably resembles the one that occurs during hydrolysis.

189 The observed cooperativity between the nucleotide binding sites explains several previously  
190 observed effects of point mutations in one of the nucleotide binding pockets of functional Hsp90  
191 heterodimers.

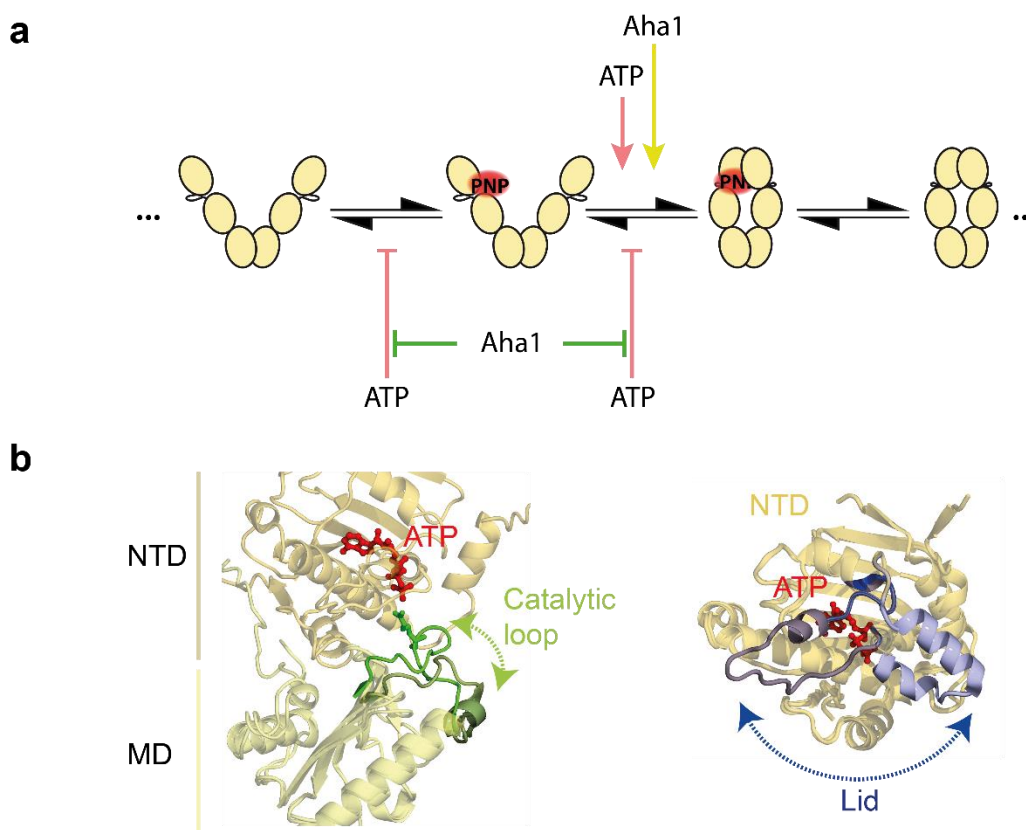

192  
193 Figure 5: The effects of ATP and Aha1 on the state transitions of Hsp90 and their potential  
194 molecular origins. (a) A minimal model for the state transitions of Hsp90 in presence of AMP-  
195 PNP\* and the effects of ATP and Aha1 on these transitions. Only the most frequent transitions  
196 are shown. ATP increases the closing rate of Hsp90 with AMP-PNP\* bound, and decelerates  
197 the reverse reaction, as well as the dissociation of AMP-PNP\*. Aha1 also accelerates the  
198 closing of AMP-PNP\* bound Hsp90. In a combination of Aha1 and ATP, their effects on the  
199 closing of AMP-PNP\* bound Hsp90 add up, while Aha1 prevents the decelerating effects of  
200 ATP. (b) Our observations could be caused by the depicted local rearrangements, which have  
201 been proposed to be affected by Aha1 and nucleotide binding. Left, reported rearrangement of  
202 the catalytic loop upon binding of Aha1 (green and dark green, superposition of the crystal  
203 structures PDB 2cg9<sup>19</sup> and 1osv<sup>20</sup>). Right, reported conformation of the nucleotide lid in the  
204 AMP-PNP or the ADP bound crystal structures (dark and light blue, super position of the crystal  
205 structures PDB 2cg9 and 2wep<sup>21</sup>).

206

207 That is, the effects of point mutations impairing nucleotide binding (D79N) or hydrolysis (E33A)  
208 on the ATPase rate vary significantly<sup>5,10–12</sup>. On the one hand, an Hsp90 heterodimer able to bind  
209 only one ATP exhibits an increased Michaelis-Menten constant  $K_M$ <sup>5,11</sup>. Hence, in absence of a  
210 second ATP, the apparent nucleotide affinity of Hsp90 drops. The apparent nucleotide affinity in  
211 ensemble experiments always represents combined affinities, because Hsp90 exists in an  
212 equilibrium of at least two conformational states with the ability to bind ATP<sup>22</sup>. On the other  
213 hand, an Hsp90 heterodimer able to bind two ATPs, but with the ability to hydrolyze only one,  
214 displays a decreased  $K_M$  (i.e. an increased apparent nucleotide affinity)<sup>11</sup>. In conclusion, the  
215 presence of a non-hydrolyzable nucleotide increases the apparent nucleotide affinity, while its  
216 absence decreases it. Both findings are readily explained by our observation of cooperativity  
217 among the two nucleotide binding pockets. If one binding pocket is occupied by a non-  
218 hydrolyzable nucleotide, the addition of ATP and thus the occupation of the second binding  
219 pocket with ATP results in a prolonged binding of the nucleotide. According to our proposed  
220 model (Fig. 5a), this results in an increase in closed nucleotide-bound Hsp90. That is in turn the  
221 conformational prerequisite for hydrolysis, since a correlation between population of the closed  
222 conformation of Hsp90 and ATPase rate has been reported<sup>10,23</sup>. The cooperativity between the  
223 two pockets is an additional aspect of Hsp90's cross-monomer coordination, which happens  
224 before the actual hydrolysis of nucleotide<sup>24</sup>.

225 Our data also allows a deeper insight into the microscopic causes for the cooperativity. The  
226 addition of ATP accelerates the closing of AMP-PNP\* bound Hsp90 ( $O^* \rightarrow C^*$ ), it decelerates the  
227 opening of AMP-PNP\* bound Hsp90 ( $C^* \rightarrow O^*$ ) and the dissociation of AMP-PNP\* from open  
228 Hsp90 ( $O^* \rightarrow O$ ). The latter could be achieved either by a communication between the two  
229 nucleotide binding sites through the whole dimer<sup>12,25</sup> or by a direct interaction between the N-  
230 domains. Direct steric contacts of the two NTDs in the open state are possible, because the  
231 open conformation of Hsp90 represents a flexible and highly dynamic ensemble<sup>7</sup>. Interestingly,  
232 a stable N-terminal closure of Hsp90 has been reported for saturating AMP-PNP conditions but  
233 not for ATP<sup>6,9,10</sup>. Here, we see that the presence of AMP-PNP in one binding pocket and the  
234 absence of nucleotide in the other is not sufficient for a more pronounced closed state of Hsp90.  
235 However, the presence of ATP in one binding pocket and AMP-PNP in the other results in a  
236 larger population of the closed state. Thus, binding of one AMP-PNP results in a conformational  
237 change that is the prerequisite for a more stable N-terminal dimerization. ATP has been  
238 proposed to affect the lid dynamics of Hsp90<sup>26</sup>, which can then facilitate the N-M arrangement  
239 necessary for the transition into the closed Hsp90 conformation. This molecular arrangement  
240 would explain the decreased opening rate ( $C^* \rightarrow O^*$ ) as well.

241 Furthermore, our data reflects the role of Aha1 as an accelerator of Hsp90's conformational  
242 rearrangements and ATPase activity<sup>18,27</sup>. We find that Aha1 accelerates the transition from the  
243 open nucleotide bound ( $O^*$ ) to the closed nucleotide bound state ( $C^*$ ) in absence of additional  
244 nucleotide. As only the forward reaction is affected ( $O^* \rightarrow C^*$ ) while the reverse is not, Aha1 is  
245 not acting in an enzyme-like fashion on this transition. Instead, Aha1 decreases not only the  
246 energy barrier of the  $O^* \rightarrow C^*$  transition, but it also affects the equilibrium between these two  
247 states. This shift of AMP-PNP\* bound Hsp90 towards the closed state in our experiments  
248 matches the previous finding of a stronger binding of Aha1 to the latter conformation<sup>28,29</sup>. Aha1  
249 has been reported to modulate the catalytic loop of Hsp90 to facilitate the conformational  
250 transition from open to closed Hsp90<sup>20</sup> (Fig. 5b). This is could be the microscopic cause for the  
251 effect we observe.



252 The addition of both, ATP and Aha1 to our assay allows further and novel insight into the  
253 distinct effects of nucleotide and co-chaperone on Hsp90's conformational dynamics. Their  
254 common and strongest effects, accelerating the closing of open, AMP-PNP\* bound Hsp90  
255 ( $O^* \rightarrow C^*$ ), add up. Because the concentration of Aha1 in our experiment is close to  
256 saturation<sup>18,28,30</sup>, we assume that the co-chaperone is already exerting its full activation  
257 potential. Nevertheless, the transition can be further accelerated by the addition of ATP. This  
258 suggests that ATP and Aha1 affect different structural rearrangements independently, both  
259 resulting in an accelerated closing of Hsp90. The decelerating effect of ATP on the opening of  
260 AMP-PNP\* bound Hsp90 and dissociation of AMP-PNP\* from open Hsp90 is abolished by  
261 Aha1. Thus, a structural arrangement leading to a tighter binding of nucleotide when both  
262 binding pockets are occupied is impeded by the co-chaperone. Therefore, on the one hand,  
263 ATP and Aha1 work to the same aim (namely closure of the dimer). On the other hand, they act  
264 antagonistic on two transitions (i.e. opening of dimer and dissociation of nucleotide). Thus, we  
265 conclude that at least two different structural motifs of Hsp90 are involved in their interaction.  
266 Apart from the aforementioned catalytic loop, the ATP lid might be influenced by both, ATP and  
267 Aha1<sup>30</sup>.

268 Our single molecule data and analysis enables us to conclude that the previously observed  
269 overall accelerating effect of Aha1 on Hsp90's conformational transitions<sup>29,31</sup> is the result of at  
270 least two distinct and interfering modulations by the nucleotide and the co-chaperone. This  
271 demonstrates that simplifications assuming co-chaperones affect only single state transitions of  
272 Hsp90 do not reflect the complexity of this chaperone system. This possibly applies to many  
273 other catalytic systems with more than one binding site.

274 As a chaperone, Hsp90 interacts with folding intermediates of client proteins<sup>1</sup>. A recently  
275 published structure shows closed Hsp90 separating two domains of a kinase for correct folding  
276 and maturation in form of a molecular clamp<sup>32</sup>. In this context, we speculate that Aha1 together  
277 with ATP could increase the frequency of attempts of Hsp90 to separate the two domains of a  
278 client as an essential step in correct protein folding or maturation.

279

## 280 **Methods**

281 All chemicals were purchased from Sigma-Aldrich if not stated otherwise.

### 282 Protein expression, purification, labeling

283 Hsp90 from *S. cerevisiae* (UniProt ID P02829) is expressed in form of two single cysteine point  
284 mutants at the positions 61 and 385, with a cleavable N-terminal His-SUMO-tag and a C-  
285 terminal zipper ensuring the dimeric nature of the protein at picomolar concentrations. In the  
286 case of the 385C mutant, the construct contains an additional AviTag (Avidity LLC) at the  
287 extreme C-terminus for *in vivo* biotinylation<sup>9</sup>. Proteins were expressed and purified as described  
288 in<sup>17</sup>.

289 Hsp90 61C is labeled in 1x PBS pH 6.7 with Atto488-Maleimide, Hsp90 385C with Atto550-  
290 Maleimide (AttoTec GmbH), following the protocol provided in<sup>17</sup>. In case of Atto488, additional  
291 0.5 mg/ml BSA are present.

292 Aha1 from *S. cerevisiae* (UniProt ID Q12449) is expressed and purified as wild-type construct  
293 with a cleavable N-terminal His-SUMO tag from pET28a. Transformed *E. coli* BL21Star (DE3)

294 (Thermo Fischer Scientific) are grown at 37 °C in TB<sub>Kan</sub> to OD<sub>600</sub> of 0.6 and induced for 4 h.  
295 Cells are harvested by centrifugation, washed with phosphate buffered saline and lysed in a Cell  
296 Disrupter (Constant Systems) at 1.6 kbar. After filtration, the cell debris is applied to a 5 mL  
297 HisTrap HP (GE Healthcare) and eluted by a linear gradient from 0 to 500 mM imidazole in  
298 100 mM sodium phosphate, 300 mM NaCl pH 8.0 at 8 °C. Protein-containing fractions are  
299 pooled and dialyzed into the imidazole-free buffer overnight in the presence of 1/100 mol/mol  
300 Semp protease to cleave the tag. The solution is again applied to the HisTrap column and the  
301 flow-through is collected and diluted 1:3 in 40 mM MES, pH 6, 40 mM NaCl and subsequently  
302 applied to a HiTrapSP 5 mL column (GE Healthcare). The protein is eluted with a linear gradient  
303 to 1 M NaCl. Protein is reduced with 1 mM DTT and concentrated. Finally, it is applied to a  
304 HiLoad 16/600 Superdex200 (GE Healthcare) and eluted with 40 mM Hepes, 200 mM KCl  
305 pH 7.5. Sample purity is checked by SDS-PAGE.

### 306 ATPase assay

307 ATPase activity is determined with a regenerating ATPase assay. ATPase rates are measured  
308 at 37 °C with 2 mM ATP in 40 mM Hepes, 150 mM KCl, 10 mM MgCl<sub>2</sub>, pH 7.5. ATPase  
309 background is detected by specific inhibition of Hsp90 with radicicol and subtracted.

### 310 Fluorescence anisotropy

311 Fluorescence anisotropy of labeled nucleotide is measured on a fluorescence spectrometer  
312 (Fluoromax-4, Horiba) with a temperature control unit (TC425, Quantum Northwest) at 25 °C.  
313 The label Atto647N is excited at 630 nm, fluorescence is detected at 660 nm with excitation and  
314 detection slits set to a width of 2 nm. The G-factor is determined prior to titration of protein and  
315 kept constant for the correction of all titration data points.

### 316 Three-color smFRET measurements

317 Heterodimers of Hsp9061C-Atto488 and Hsp90<sub>Biotin</sub>385C-Atto550 are formed by the incubation  
318 of an overall 1 μM 5:1 mix for 20 minutes at 47 °C. Aggregates are subsequently removed by  
319 extensive centrifugation (> 30 minutes 17,000 xg).

320 Heterodimers are flushed into the custom built flow chamber depicted in<sup>17</sup> at an appropriate  
321 concentration (approx. 10 pM) to reach sufficient surface density. Unbound protein is flushed  
322 out with buffer. 25 nM AMP-PNP-647N (AMP-γ-(6-Aminohexyl)-PNP-Atto647N, Jena  
323 Bioscience), here called AMP-PNP\*, and 250 μM unlabeled nucleotide and/or 10 μM co-  
324 chaperone are flushed into the chamber. This step is repeated after 5 minutes of incubation  
325 again. All experiments are conducted in 40 mM Hepes, 150 mM KCl, 10 mM MgCl<sub>2</sub>, pH 7.5 and  
326 0.5 mg/ml BSA.

327 smFRET traces are recorded by alternating laser excitation with a multi-color smFRET prism-  
328 type TIRF setup, as detailed in<sup>17</sup>. Shortly, Atto488 and Atto550 are excited with a blue (Cobolt  
329 Blues 50 mW, Cobolt) and a green (Compass 215M 75 mW, Coherent Inc.) laser at 473 and  
330 532 nm, and fluorescence in the respective blue, green and red (for Atto647N) emission  
331 channels is detected by two EMCCD cameras (iXon Ultra 897, Andor Technology Ltd). Shutters,  
332 AOTF and cameras are synchronized by a digital I/O card (PCIe-6535, National Instruments).  
333 The overall time resolution of our experiments is 200 ms per excitation cycle, with each  
334 excitation lasting 70 ms (+30 ms read-out).

### 335 Relative State population

336 We calculate the partial fluorescence ( $PF_{em}^{ex}$ ) from the five intensity traces analogous to the  
337 FRET efficiency of a two-color experiment<sup>17</sup>. E.g. the partial fluorescence of AMP-PNP\*  
338 (identifier “red”) after excitation of Atto488 (“blue”) is given by:

$$339 \quad (1) \quad PF_{red}^{blue} = \frac{corr_{red}^{blue}}{corr_{blue}^{blue} + corr_{green}^{blue} + corr_{red}^{blue}}$$

340 The relative state populations are determined from 2D projections of the PF histogram on the  
341  $PF_{red}^{blue}/PF_{red}^{green}$  and  $PF_{green}^{blue}/PF_{red}^{blue}$  planes. Populations are selected by drawing free-hand  
342 polygons that represent the location of each state. This procedure was repeated three times to  
343 minimize the effect of manual selection.

#### 344 Ensemble HMM

345 The 3D histogram of the observed PFs reveals five different populations that are fitted by the  
346 sum of five 3D Gaussians with means and covariance matrix as fitting parameters. A global  
347 HMM was optimized for each data set with the emission probabilities for each state fixed to the  
348 3D Gaussians determined by the fit.

349 The resulting transition matrix is multiplied with the frame rate to yield the rate constants of the  
350 transitions. Rates from functional equal states (the both O\* states) were added for clarity.

351 Dwell times of the AMP-PNP\* bound fraction are extracted from the Viterbi path. Dwells without  
352 recorded start and/or end where also included.

353 All data analysis was done with custom written scripts in Igor Pro (Wavemetrics). The code is  
354 available upon request.

#### 355 Error estimates

356 Dwell time distributions follow exponential functions. The mean of random samples from a dwell  
357 time distribution follows approximately a normal distribution for a large number of samples  
358 (central limit theorem). The variance of a normal distributed quantity that has been sampled  $n$   
359 times can then be estimated by the jackknife-1 method, i.e. calculation from all possible  
360 combinations of  $n-1$  dwells. It is then estimated by<sup>33</sup>:

$$361 \quad (2) \quad \sigma_{jack}^2 = \frac{n-1}{n} \sum_{i=1}^n (x_i - \bar{x})^2, \text{ with } \bar{x} = \frac{1}{n} \sum_{i=1}^n x_i$$

362 The error of the population size was estimated by the standard deviation of ten random subsets  
363 containing 75 % of the frames in the data set.

#### 364 Statistical tests

365 The dwell time distributions were post-hoc tested pairwise for significant differences by a one-  
366 sided Wilcoxon-Mann-Whitney two-sample rank test as implemented in Igor Pro (Wavemetrics).  
367 Test results are given in Supplementary Results, Supplementary Table 3.

368 The determined populations were tested for normal distribution by a Shapiro-Wilk test (as  
369 implemented in Igor Pro) on the subset distributions, results are given in Supplementary  
370 Results, Supplementary Table 2. The populations from different subsets were tested for

371 significant differences post-hoc by an unpaired pairwise *t*-tests on the C\* population. Results are  
372 given in Supplementary Results, Supplementary Table 1.

373

## 374 **References**

- 375 1. Taipale, M., Jarosz, D. F. & Lindquist, S. HSP90 at the hub of protein homeostasis:  
376 emerging mechanistic insights. *Nature reviews. Molecular cell biology* **11**, 515–528 (2010).
- 377 2. Eckl, J. M. & Richter, K. Functions of the Hsp90 chaperone system: lifting client proteins to  
378 new heights. *International Journal of Biochemistry and Molecular Biology* **4**, 157–165 (2013).
- 379 3. Jhaveri, K. *et al.* Heat shock protein 90 inhibitors in the treatment of cancer: current status  
380 and future directions. *Expert opinion on investigational drugs* **23**, 611–628 (2014).
- 381 4. Panaretou, B. *et al.* ATP binding and hydrolysis are essential to the function of the Hsp90  
382 molecular chaperone in vivo. *The EMBO journal* **17**, 4829–4836 (1998).
- 383 5. Richter, K., Muschler, P., Hainzl, O. & Buchner, J. Coordinated ATP hydrolysis by the Hsp90  
384 dimer. *The Journal of biological chemistry* **276**, 33689–33696 (2001).
- 385 6. Mickler, M., Hessling, M., Ratzke, C., Buchner, J. & Hugel, T. The large conformational  
386 changes of Hsp90 are only weakly coupled to ATP hydrolysis. *Nature structural & molecular*  
387 *biology* **16**, 281–286 (2009).
- 388 7. Hellenkamp, B., Wortmann, P., Kandzia, F., Zacharias, M. & Hugel, T. Multidomain structure  
389 and correlated dynamics determined by self-consistent FRET networks. *Nature methods* **14**,  
390 174–180 (2017).
- 391 8. Krukenberg, K. A., Forster, F., Rice, L. M., Sali, A. & Agard, D. A. Multiple conformations of  
392 *E. coli* Hsp90 in solution: insights into the conformational dynamics of Hsp90. *Structure*  
393 (*London, England : 1993*) **16**, 755–765 (2008).
- 394 9. Schmid, S., Götz, M. & Hugel, T. Single-Molecule Analysis beyond Dwell Times:  
395 Demonstration and Assessment in and out of Equilibrium. *Biophysical journal* **111**, 1375–  
396 1384 (2016).
- 397 10. Zierer, B. K. *et al.* Importance of cycle timing for the function of the molecular chaperone  
398 Hsp90. *Nature structural & molecular biology* **23**, 1020–1028 (2016).
- 399 11. Mishra, P. & Bolon, D. N. A. Designed Hsp90 heterodimers reveal an asymmetric ATPase-  
400 driven mechanism in vivo. *Molecular cell* **53**, 344–350 (2014).
- 401 12. Obermann, W. M., Sondermann, H., Russo, A. A., Pavletich, N. P. & Hartl, F. U. In Vivo  
402 Function of Hsp90 Is Dependent on ATP Binding and ATP Hydrolysis. *J Cell Biol* **143**, 901–  
403 910 (1998).
- 404 13. McLaughlin, S. H., Ventouras, L.-A., Lobbezoo, B. & Jackson, S. E. Independent ATPase  
405 activity of Hsp90 subunits creates a flexible assembly platform. *Journal of molecular biology*  
406 **344**, 813–826 (2004).
- 407 14. Stefan, M. I. & Le Novere, N. Cooperative binding. *PLoS computational biology* **9**, e1003106  
408 (2013).

- 409 15. Person, B., Stein, I. H., Steinhauer, C., Vogelsang, J. & Tinnefeld, P. Correlated movement  
410 and bending of nucleic acid structures visualized by multicolor single-molecule  
411 spectroscopy. *Chemphyschem : a European journal of chemical physics and physical*  
412 *chemistry* **10**, 1455–1460 (2009).
- 413 16. Lee, N. K. *et al.* Three-color alternating-laser excitation of single molecules: monitoring  
414 multiple interactions and distances. *Biophysical journal* **92**, 303–312 (2007).
- 415 17. Götz, M., Wortmann, P., Schmid, S. & Hugel, T. A Multicolor Single-Molecule FRET  
416 Approach to Study Protein Dynamics and Interactions Simultaneously. *Methods in*  
417 *enzymology* **581**, 487–516 (2016).
- 418 18. Panaretou, B. *et al.* Activation of the ATPase activity of hsp90 by the stress-regulated  
419 cochaperone aha1. *Molecular cell* **10**, 1307–1318 (2002).
- 420 19. Ali, M. M. U. *et al.* Crystal structure of an Hsp90-nucleotide-p23/Sba1 closed chaperone  
421 complex. *Nature* **440**, 1013–1017 (2006).
- 422 20. Meyer, P. *et al.* Structural basis for recruitment of the ATPase activator Aha1 to the Hsp90  
423 chaperone machinery. *The EMBO journal* **23**, 511–519 (2004).
- 424 21. Prodromou, C. *et al.* Structural basis of the radicicol resistance displayed by a fungal hsp90.  
425 *ACS chemical biology* **4**, 289–297 (2009).
- 426 22. Ratzke, C., Berkemeier, F. & Hugel, T. Heat shock protein 90's mechanochemical cycle is  
427 dominated by thermal fluctuations. *Proceedings of the National Academy of Sciences of the*  
428 *United States of America* **109**, 161–166 (2012).
- 429 23. Halpin, J. C., Huang, B., Sun, M. & Street, T. O. Crowding Activates Heat Shock Protein 90.  
430 *The Journal of biological chemistry* **291**, 6447–6455 (2016).
- 431 24. Cunningham, C. N., Krukenberg, K. A. & Agard, D. A. Intra- and intermonomer interactions  
432 are required to synergistically facilitate ATP hydrolysis in Hsp90. *The Journal of biological*  
433 *chemistry* **283**, 21170–21178 (2008).
- 434 25. Morra, G., Verkhivker, G. & Colombo, G. Modeling signal propagation mechanisms and  
435 ligand-based conformational dynamics of the Hsp90 molecular chaperone full-length dimer.  
436 *PLoS computational biology* **5**, e1000323 (2009).
- 437 26. Prodromou, C. *et al.* The ATPase cycle of Hsp90 drives a molecular 'clamp' via transient  
438 dimerization of the N-terminal domains. *The EMBO journal* **19**, 4383–4392 (2000).
- 439 27. Prodromou, C. Mechanisms of Hsp90 regulation. *Biochemical Journal* **473**, 2439–2452  
440 (2016).
- 441 28. Retzlaff, M. *et al.* Asymmetric activation of the hsp90 dimer by its cochaperone aha1.  
442 *Molecular cell* **37**, 344–354 (2010).
- 443 29. Li, J., Richter, K., Reinstein, J. & Buchner, J. Integration of the accelerator Aha1 in the  
444 Hsp90 co-chaperone cycle. *Nature structural & molecular biology* **20**, 326–331 (2013).
- 445 30. Siligardi, G. *et al.* Co-chaperone regulation of conformational switching in the Hsp90 ATPase  
446 cycle. *The Journal of biological chemistry* **279**, 51989–51998 (2004).
- 447 31. Schulze, A. *et al.* Cooperation of local motions in the Hsp90 molecular chaperone ATPase  
448 mechanism. *Nature Chemical Biology* **12**, 628–635 (2016).

449 32. Verba, K. A. *et al.* Atomic structure of Hsp90-Cdc37-Cdk4 reveals that Hsp90 traps and  
450 stabilizes an unfolded kinase. *Science (New York, N.Y.)* **352**, 1542–1547 (2016).

451 33. Shao, J. & Wu, C. F. J. A General Theory for Jackknife Variance Estimation. *Ann. Statist.*  
452 **17**, 1176–1197 (1989).

453

454

#### 455 Acknowledgments

456 We thank Dieter Hauschke and Jens Timmer for advice on data statistics. We thank Bizan  
457 Balzer, Björn Hellenkamp, Markus Jahn, Sonja Schmid, Katarzyna Tych and Matthias Rief for  
458 helpful discussions. This work is funded by the European Research Council through ERC grant  
459 agreement no. 681891.

460

#### 461 Author contributions

462 T.H., P.W. and M.G. designed research. P.W. and M.G. performed experiments and analyzed  
463 the data. P.W., M.G. and T.H. interpreted the data and wrote the manuscript.

464

#### 465 Competing financial interests

466 The authors declare no competing financial interests.

467
